# Supplementary material for: Polymorphism and photoluminescence seen in (2-amino-5-chloropyridine)·(9-anthracenecarboxylic acid)·(trinitrobenzene): a further example of the salt-cocrystal continuum observed by virtue of isolating multiple crystal forms
Source: Royal Society of Chemistry journal article supplement (doi:10.1039/d2ce00490a), 2022-01-01
Supplement: d2ce00490a1.pdf [file d2ce00490a1.pdf]

## Supplementary Information

### *Polymorphism of the ternary complex (2-amino-5-chloropyridine)·(9-anthracenecarboxylic acid)·(trinitrobenzene)*

Atiyyah Salajee

#### A. Molecular Overlay

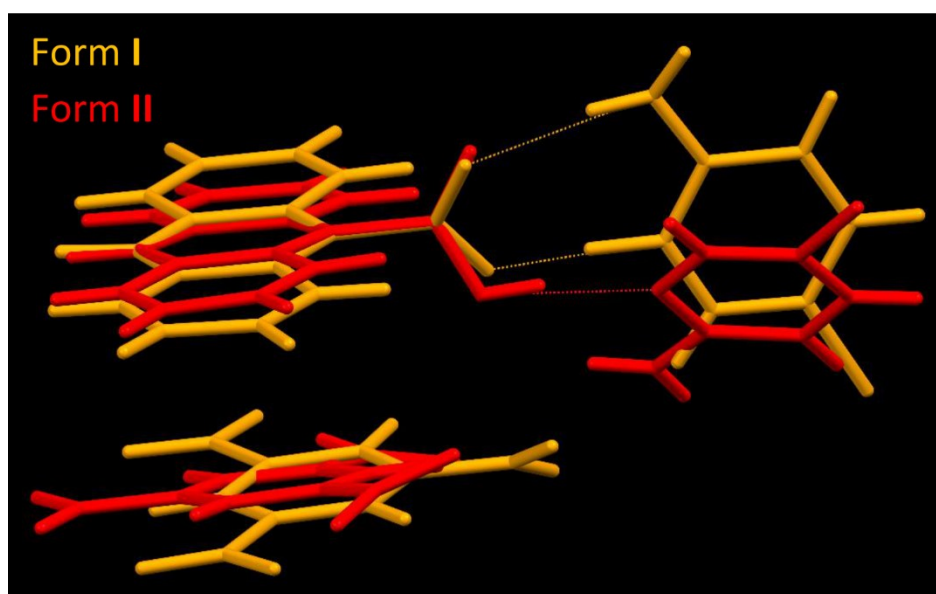

**Figure S1.** Overlays of pairs of polymorphs showing the relative positions to the common 9-aca molecule.

## B. Difference Fourier Maps

Difference Fourier maps for forms **I** and **II** were generated using PLATON, to identify the location of the proton in order to determine whether proton transfer occurred between O7 and N4.

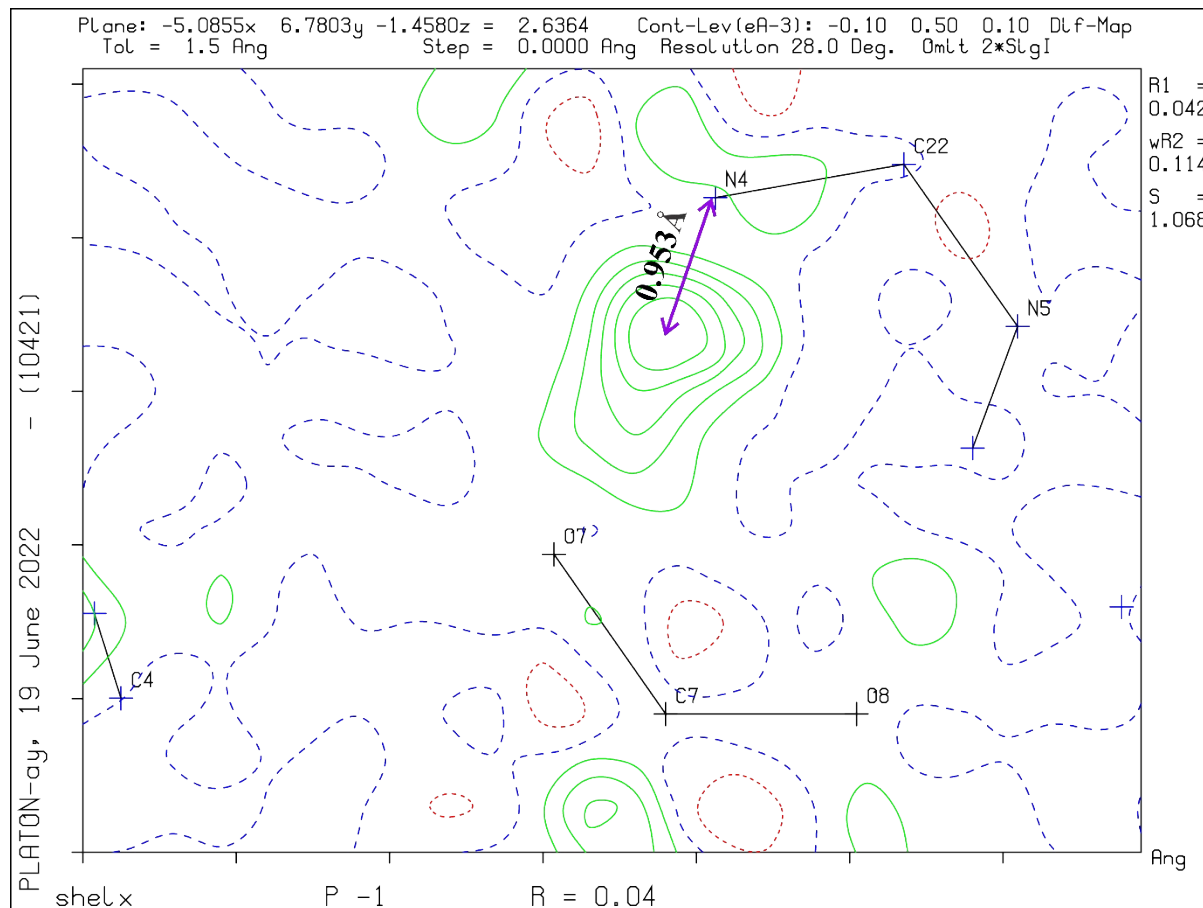

**Figure S2.** Difference Fourier map of form **I**.

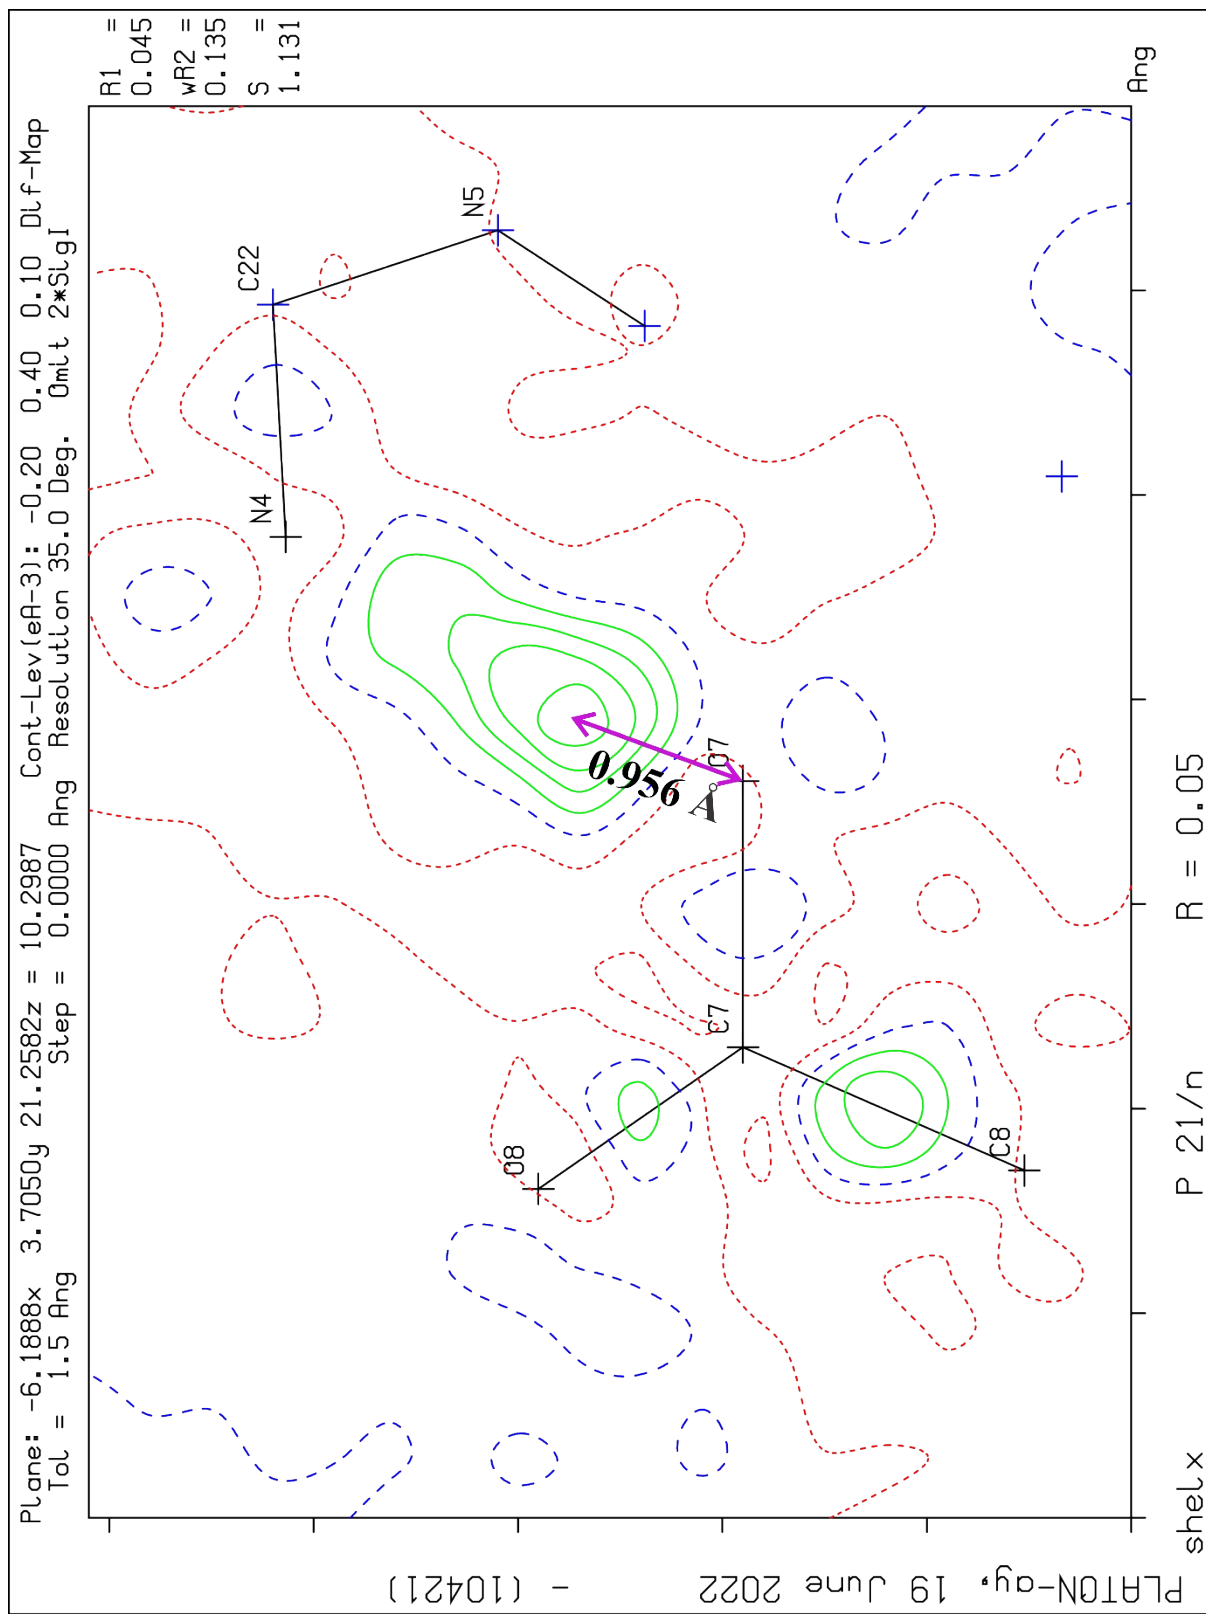

**Figure S3.** Difference Fourier map of form II.

### C. Intermolecular Potentials

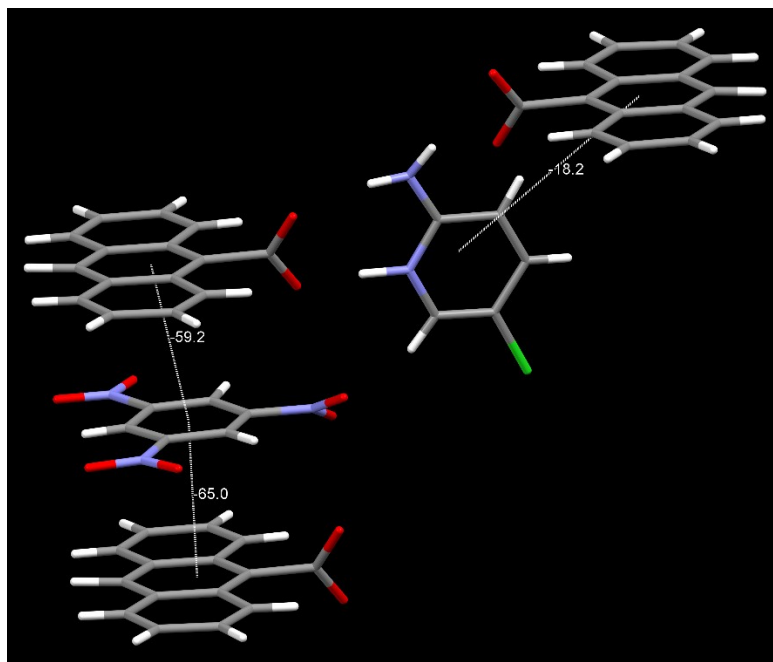

**Figure S4.** Calculated intermolecular potentials using the UNI force field for Form I. Only the strongest three are shown.

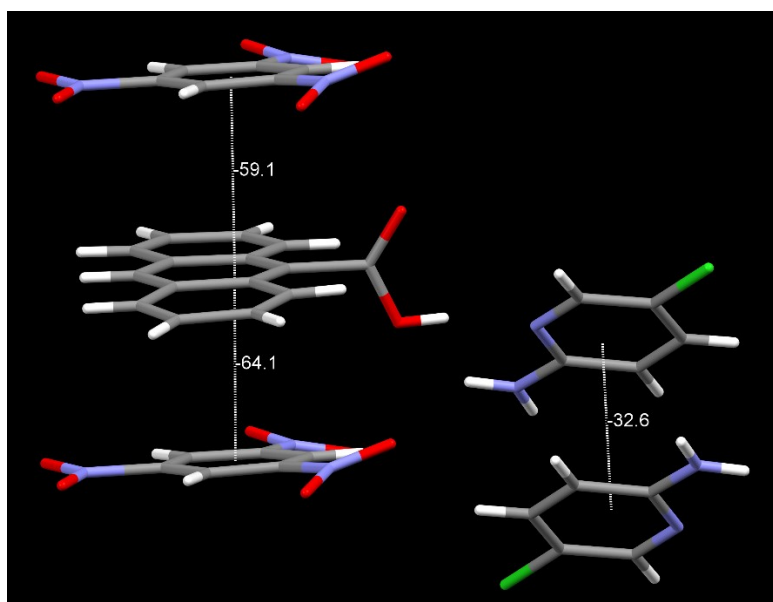

**Figure S5.** Calculated intermolecular potentials using the UNI force field for Form II. Only the strongest three are shown.

## D. Experimental Setup

All reagents used for synthesis and characterization were of analytical grade, purchased from Sigma-Aldrich, unless otherwise stated. Reagents were used as received, without further purification. In most experiments, a 1:1:1 stoichiometric ratio was used. 20 mg of trinitrobenzene (0.094 mmol), 20 mg of 9-anthracenecarboxylic acid (0.090 mmol) and 12 mg of 2-amino-5-chloropyridine (0.093 mmol) were weighed out. In some experiments, the amount of pyridine used was increased, giving stoichiometric ratios of 1:1:2 and 1:1:3 of tnb:9aca:2a5clp. All solutions were heated and stirred.

**Table S1.** Crash Crystallization Experiments\*

| Solvent           | Result                      |
|-------------------|-----------------------------|
| ethanol (1mL)     | Form <b>I</b>               |
| ethanol (2mL)     | Form <b>I</b> and <b>II</b> |
| methanol (1mL)    | Form <b>I</b> and <b>II</b> |
| methanol (2mL)    | Form <b>I</b> and <b>II</b> |
| isopropanol (1mL) | Form <b>I</b> and <b>II</b> |
| isopropanol (2mL) | Form <b>I</b> and <b>II</b> |

\*orange seed crystals were added to promote the formation of form **I**.

**Table S2.** Slow Evaporation Experiments

| Solvent System        |     | Temperature      | Stoichiometric Ratio | Result                      |
|-----------------------|-----|------------------|----------------------|-----------------------------|
| acetonitrile          |     | room temperature | 1:1:1                | Form <b>I</b>               |
|                       |     | room temperature | 1:1:2                | Form <b>I</b>               |
|                       |     | room temperature | 1:1:3                | Form <b>I</b>               |
|                       |     | oven @ 36°C      | 1:1:1                | Form <b>I</b> and <b>II</b> |
| ethanol               |     | room temperature | 1:1:1                | Form <b>I</b> and <b>II</b> |
|                       |     | room temperature | 1:1:3                | Form <b>I</b>               |
|                       |     | oven @ 36°C      | 1:1:3                | Form <b>I</b> and <b>II</b> |
| methanol              |     | room temperature | 1:1:1                | Form <b>II</b>              |
|                       |     | oven @ 36°C      | 1:1:1                | Form <b>I</b> and <b>II</b> |
| acetonitrile/ethanol  | 1:1 | room temperature | 1:1:1                | Form <b>I</b> and <b>II</b> |
|                       | 2:1 | room temperature | 1:1:1                | Form <b>I</b> and <b>II</b> |
|                       | 3:1 | room temperature | 1:1:1                | Form <b>I</b> and <b>II</b> |
|                       | 1:2 | room temperature | 1:1:1                | Form <b>I</b> and <b>II</b> |
|                       | 1:3 | room temperature | 1:1:1                | Form <b>I</b> and <b>II</b> |
|                       | 1:1 | oven @ 36°C      | 1:1:1                | Form <b>II</b>              |
|                       | 2:1 | oven @ 36°C      | 1:1:1                | Form <b>II</b>              |
|                       | 3:1 | oven @ 36°C      | 1:1:1                | Form <b>II</b>              |
|                       | 1:2 | oven @ 36°C      | 1:1:1                | Form <b>II</b>              |
|                       | 1:3 | oven @ 36°C      | 1:1:1                | Form <b>II</b>              |
| ethyl acetate/toluene | 1:1 | room temperature | 1:1:1                | Form <b>II</b>              |
|                       | 2:1 | room temperature | 1:1:1                | Form <b>II</b>              |
|                       | 3:2 | room temperature | 1:1:1                | Form <b>II</b>              |
|                       | 1:1 | oven @ 36°C      | 1:1:1                | Form <b>I</b>               |
|                       | 3:1 | oven @ 36°C      | 1:1:1                | Form <b>I</b>               |
|                       | 3:2 | oven @ 36°C      | 1:1:1                | Form <b>II</b>              |

Slurry experiments:

1. Stoichiometric amounts of **tnb**, **9aca**, and **2a5clp** were combined in a sample vial. Hexane was the solvent of choice since the starting reagents were insoluble in it. The vial was sealed, and the mixture was left to stir for 24hrs. Thereafter, the vial was opened to allow the remaining hexane to evaporate. A red powder remained.
2. Red and orange crystals (5mg each), of forms **I** and **II** respectively, were placed in a vial with hexane. The vial was sealed, and the mixture left to stir for 24hrs. Thereafter, the vial was opened to allow the remaining hexane to evaporate. A red powder formed.

## E. Single Crystal Diffraction Data

All data collections were obtained on a Bruker Venture D8 Photon CMOS diffractometer with graphite-monochromated  $\text{MoK}\alpha_1$  ( $\lambda = 0.71073 \text{ \AA}$ ) radiation at 173 K using an Oxford Cryostream Plus cooler. The collection method involved  $\omega$ -scans with a  $0.5^\circ$  width. SAINT+ version 6.02.6<sup>1</sup> software was used for data reduction and *SADABS*<sup>2</sup> was used to make empirical absorption corrections. The crystal structures were solved using direct methods on *SHELXS-97*.<sup>3</sup> Non-hydrogen atoms were first refined isotropically, followed by anisotropic refinement by full matrix least-squares calculations based on  $F^2$  using *SHELXL-2017*.<sup>3</sup> C-bound H atoms were located in the difference map, then positioned geometrically and were allowed to ride on their respective parent atoms, with thermal displacement parameters 1.2 times of the parent C atom. For Form **I** and **II**, the coordinates and isotropic displacement parameters of the N-bound amine H atoms involved in hydrogen bonding interactions were allowed to refine freely. For Form **I**, the N-bound pyridine H atom was placed geometrically and was allowed to ride on its respective parent atom, with thermal displacement parameters 1.2 times of the parent N atom. For Form **II**, the O-bound H atom was placed geometrically and was allowed to ride on its respective parent atom, with thermal displacement parameters 1.5 times of the parent O atom. For the positional disorder model applied to form **I** and **II**, the same procedure was used. The N-bound pyridine H atom and O-bound carboxylic acid H atom were placed geometrically (both ride on their parent atoms and have their thermal displacement parameters 1.2 times of the parent N atom or 1.5 times of the parent O atom) and their relative site-occupancies refined freely. For form **I**, this gave a ratio of 0.69(3) (N-bound H) to 0.31(3) (O-bound) and for form **II**, 0.69(3) (O-bound H) to 0.31(3) (N-bound). Diagrams and publication material were generated using *WinGX*,<sup>4</sup> *ORTEP-3*,<sup>4</sup> *PLATON*<sup>5</sup> and *MERCURY*.<sup>6</sup>

1. SAINT+, Version 6.02 (Includes XPREP and SADABS); Bruker AXS Inc: Madison, Wisconsin, USA, 2004.
2. Krause, L., Herbst-Irmer, R., Sheldrick, G. M. & Stalke, D. (2015). *J. Appl. Cryst.* 48, 3–10.
3. Sheldrick, G. M., *Acta Crystallogr., Sect. C.* 2015, 71 (Pt 1), 3-8.
4. Farrugia, L., *J. Appl. Crystallogr.* 2012, 45 (4), 849-854.
5. Spek, A., *Acta Crystallogr., Sect. D.* 2009, 65 (2), 148-155.
6. C. F. Macrae, I. Sovago, S. J. Cottrell, P. T. A. Galek, P. McCabe, E. Pidcock, M. Platings, G. P. Shields, J. S. Stevens, M. Towler and P. A. Wood, *J. Appl. Cryst.* 2020, 53, 226-235.



**Table S3.** Crystal data and structure refinement for **Form I**

|                                   |                                                                                                                                                                       |
|-----------------------------------|-----------------------------------------------------------------------------------------------------------------------------------------------------------------------|
| Identification code               | Form I                                                                                                                                                                |
| Empirical formula                 | C <sub>26</sub> H <sub>18</sub> Cl N <sub>5</sub> O <sub>8</sub>                                                                                                      |
| Formula weight                    | 563.90                                                                                                                                                                |
| Temperature                       | 173(2) K                                                                                                                                                              |
| Wavelength                        | 0.71073 Å                                                                                                                                                             |
| Crystal system                    | Triclinic                                                                                                                                                             |
| Space group                       | P -1                                                                                                                                                                  |
| Unit cell dimensions              | a = 7.1140(2) Å                      α = 88.738(2)°.<br>b = 9.7490(3) Å                      β = 81.565(2)°.<br>c = 18.0972(5) Å                      γ = 89.703(2)°. |
| Volume                            | 1241.24(6) Å <sup>3</sup>                                                                                                                                             |
| Z                                 | 2                                                                                                                                                                     |
| Density (calculated)              | 1.509 Mg/m <sup>3</sup>                                                                                                                                               |
| Absorption coefficient            | 0.217 mm <sup>-1</sup>                                                                                                                                                |
| F(000)                            | 580                                                                                                                                                                   |
| Crystal size                      | 0.495 x 0.150 x 0.098 mm <sup>3</sup>                                                                                                                                 |
| Theta range for data collection   | 2.089 to 27.992°.                                                                                                                                                     |
| Index ranges                      | -9 ≤ h ≤ 9, -12 ≤ k ≤ 12, -23 ≤ l ≤ 23                                                                                                                                |
| Reflections collected             | 47374                                                                                                                                                                 |
| Independent reflections           | 5991 [R(int) = 0.0390]                                                                                                                                                |
| Completeness to theta = 25.242°   | 100.0 %                                                                                                                                                               |
| Absorption correction             | Semi-empirical from equivalents                                                                                                                                       |
| Max. and min. transmission        | 0.7457 and 0.7108                                                                                                                                                     |
| Refinement method                 | Full-matrix least-squares on F <sup>2</sup>                                                                                                                           |
| Data / restraints / parameters    | 5991 / 0 / 367                                                                                                                                                        |
| Goodness-of-fit on F <sup>2</sup> | 1.062                                                                                                                                                                 |
| Final R indices [I > 2σ(I)]       | R1 = 0.0406, wR2 = 0.1006                                                                                                                                             |
| R indices (all data)              | R1 = 0.0612, wR2 = 0.1109                                                                                                                                             |
| Extinction coefficient            | n/a                                                                                                                                                                   |
| Largest diff. peak and hole       | 0.290 and -0.427 e.Å <sup>-3</sup>                                                                                                                                    |
| CCDC identification code          | 2157390                                                                                                                                                               |

**Table S4.** Hydrogen bonds for Form I [ $\text{\AA}$  and  $^\circ$ ].

| D-H $\cdots$ A        | d(D-H)  | d(H $\cdots$ A) | d(D $\cdots$ A) | $\angle$ (DHA) |
|-----------------------|---------|-----------------|-----------------|----------------|
| N5-H5B $\cdots$ O8(i) | 0.90(2) | 2.23(2)         | 2.9687(19)      | 138(2)         |
| N4-H4A $\cdots$ O7    | 0.88    | 1.70            | 2.5762(16)      | 171(2)         |

Symmetry transformations used to generate equivalent atoms:

(i)  $-x, -y+1, -z+1$

**Table S5.** Crystal data and structure refinement for **Form II**

|                                   |                                                                  |                 |
|-----------------------------------|------------------------------------------------------------------|-----------------|
| Identification code               | Form II                                                          |                 |
| Empirical formula                 | C <sub>26</sub> H <sub>18</sub> Cl N <sub>5</sub> O <sub>8</sub> |                 |
| Formula weight                    | 563.90                                                           |                 |
| Temperature                       | 153(2) K                                                         |                 |
| Wavelength                        | 0.71073 Å                                                        |                 |
| Crystal system                    | Monoclinic                                                       |                 |
| Space group                       | P 21/n                                                           |                 |
| Unit cell dimensions              | a = 8.9341(5) Å                                                  | α = 90°.        |
|                                   | b = 7.2129(4) Å                                                  | β = 94.311(2)°. |
|                                   | c = 38.172(2) Å                                                  | γ = 90°.        |
| Volume                            | 2452.8(2) Å <sup>3</sup>                                         |                 |
| Z                                 | 4                                                                |                 |
| Density (calculated)              | 1.527 Mg/m <sup>3</sup>                                          |                 |
| Absorption coefficient            | 0.220 mm <sup>-1</sup>                                           |                 |
| F(000)                            | 1160                                                             |                 |
| Crystal size                      | 0.404 x 0.291 x 0.276 mm <sup>3</sup>                            |                 |
| Theta range for data collection   | 2.874 to 27.999°.                                                |                 |
| Index ranges                      | -11 ≤ h ≤ 11, -9 ≤ k ≤ 9, -50 ≤ l ≤ 50                           |                 |
| Reflections collected             | 71399                                                            |                 |
| Independent reflections           | 5853 [R(int) = 0.0140]                                           |                 |
| Completeness to theta = 25.242°   | 98.4 %                                                           |                 |
| Refinement method                 | Full-matrix least-squares on F <sup>2</sup>                      |                 |
| Data / restraints / parameters    | 5853 / 0 / 370                                                   |                 |
| Goodness-of-fit on F <sup>2</sup> | 1.062                                                            |                 |
| Final R indices [I > 2σ(I)]       | R1 = 0.0375, wR2 = 0.0997                                        |                 |
| R indices (all data)              | R1 = 0.0381, wR2 = 0.1001                                        |                 |
| Extinction coefficient            | n/a                                                              |                 |
| Largest diff. peak and hole       | 0.371 and -0.303 e.Å <sup>-3</sup>                               |                 |
| CCDC identification code          | 2157391                                                          |                 |

**Table S6.** Hydrogen bonds for form **II** [ $\text{\AA}$  and  $^\circ$ ].

| D-H $\cdots$ A         | d(D-H)  | d(H $\cdots$ A) | d(D $\cdots$ A) | $\angle$ (DHA) |
|------------------------|---------|-----------------|-----------------|----------------|
| N5-H5A $\cdots$ O4(i)  | 0.88(2) | 2.42(2)         | 3.1834(16)      | 145(2)         |
| N5-H5B $\cdots$ O4(ii) | 0.85(2) | 2.29(2)         | 3.1065(15)      | 162(2)         |
| O7-H7 $\cdots$ N4      | 0.84    | 1.71            | 2.5392(12)      | 167            |

Symmetry transformations used to generate equivalent atoms:

(i)  $x, y+1, z$  (ii)  $-x+2, -y+1, -z+1$

**Table S7.** Crystal data and structure refinement for **Form I disorder**

|                                   |                                                                  |                 |
|-----------------------------------|------------------------------------------------------------------|-----------------|
| Identification code               | Form I disorder                                                  |                 |
| Empirical formula                 | C <sub>26</sub> H <sub>18</sub> Cl N <sub>5</sub> O <sub>8</sub> |                 |
| Formula weight                    | 563.90                                                           |                 |
| Temperature                       | 173(2) K                                                         |                 |
| Wavelength                        | 0.71073 Å                                                        |                 |
| Crystal system                    | Triclinic                                                        |                 |
| Space group                       | P -1                                                             |                 |
| Unit cell dimensions              | a = 7.1140(2) Å                                                  | α = 88.738(2)°. |
|                                   | b = 9.7490(3) Å                                                  | β = 81.565(2)°. |
|                                   | c = 18.0972(5) Å                                                 | γ = 89.703(2)°. |
| Volume                            | 1241.24(6) Å <sup>3</sup>                                        |                 |
| Z                                 | 2                                                                |                 |
| Density (calculated)              | 1.509 Mg/m <sup>3</sup>                                          |                 |
| Absorption coefficient            | 0.217 mm <sup>-1</sup>                                           |                 |
| F(000)                            | 580                                                              |                 |
| Crystal size                      | 0.495 x 0.150 x 0.098 mm <sup>3</sup>                            |                 |
| Theta range for data collection   | 2.089 to 27.992°.                                                |                 |
| Index ranges                      | -9 ≤ h ≤ 9, -12 ≤ k ≤ 12, -23 ≤ l ≤ 23                           |                 |
| Reflections collected             | 47374                                                            |                 |
| Independent reflections           | 5991 [R(int) = 0.0390]                                           |                 |
| Completeness to theta = 25.242°   | 100.0 %                                                          |                 |
| Absorption correction             | Semi-empirical from equivalents                                  |                 |
| Max. and min. transmission        | 0.7457 and 0.7108                                                |                 |
| Refinement method                 | Full-matrix least-squares on F <sup>2</sup>                      |                 |
| Data / restraints / parameters    | 5991 / 0 / 371                                                   |                 |
| Goodness-of-fit on F <sup>2</sup> | 1.061                                                            |                 |
| Final R indices [I > 2σ(I)]       | R1 = 0.0403, wR2 = 0.0988                                        |                 |
| R indices (all data)              | R1 = 0.0609, wR2 = 0.1091                                        |                 |
| Extinction coefficient            | n/a                                                              |                 |
| Largest diff. peak and hole       | 0.292 and -0.425 e.Å <sup>-3</sup>                               |                 |
| CCDC identification code          | 2181218                                                          |                 |

**Table S8.** Hydrogen bonds for Form I disorder [ $\text{\AA}$  and  $^\circ$ ].

| D-H $\cdots$ A        | d(D-H)  | d(H $\cdots$ A) | d(D $\cdots$ A) | $\angle$ (DHA) |
|-----------------------|---------|-----------------|-----------------|----------------|
| N5-H5B $\cdots$ O8(i) | 0.90(2) | 2.24(2)         | 2.9687(19)      | 138(2)         |
| N4-H4A $\cdots$ O7    | 0.88    | 1.70            | 2.5762(16)      | 171            |
| O7-H7 $\cdots$ N4     | 0.84    | 1.76            | 2.5762(16)      | 162            |

Symmetry transformations used to generate equivalent atoms:

(i)  $-x, -y+1, -z+1$

**Table S9.** Crystal data and structure refinement for **Form II disorder**

|                                   |                                                                  |                 |
|-----------------------------------|------------------------------------------------------------------|-----------------|
| Identification code               | Form II disorder                                                 |                 |
| Empirical formula                 | C <sub>26</sub> H <sub>18</sub> Cl N <sub>5</sub> O <sub>8</sub> |                 |
| Formula weight                    | 563.90                                                           |                 |
| Temperature                       | 153(2) K                                                         |                 |
| Wavelength                        | 0.71073 Å                                                        |                 |
| Crystal system                    | Monoclinic                                                       |                 |
| Space group                       | P 21/n                                                           |                 |
| Unit cell dimensions              | a = 8.9341(5) Å                                                  | α = 90°.        |
|                                   | b = 7.2129(4) Å                                                  | β = 94.311(2)°. |
|                                   | c = 38.172(2) Å                                                  | γ = 90°.        |
| Volume                            | 2452.8(2) Å <sup>3</sup>                                         |                 |
| Z                                 | 4                                                                |                 |
| Density (calculated)              | 1.527 Mg/m <sup>3</sup>                                          |                 |
| Absorption coefficient            | 0.220 mm <sup>-1</sup>                                           |                 |
| F(000)                            | 1160                                                             |                 |
| Crystal size                      | 0.404 x 0.291 x 0.276 mm <sup>3</sup>                            |                 |
| Theta range for data collection   | 2.874 to 27.999°.                                                |                 |
| Index ranges                      | -11 ≤ h ≤ 11, -9 ≤ k ≤ 9, -50 ≤ l ≤ 50                           |                 |
| Reflections collected             | 71383                                                            |                 |
| Independent reflections           | 5853 [R(int) = 0.0140]                                           |                 |
| Completeness to theta = 25.242°   | 98.4 %                                                           |                 |
| Absorption correction             | Semi-empirical from equivalents                                  |                 |
| Max. and min. transmission        | 0.7471 and 0.7007                                                |                 |
| Refinement method                 | Full-matrix least-squares on F <sup>2</sup>                      |                 |
| Data / restraints / parameters    | 5853 / 0 / 371                                                   |                 |
| Goodness-of-fit on F <sup>2</sup> | 1.076                                                            |                 |
| Final R indices [I > 2σ(I)]       | R1 = 0.0372, wR2 = 0.0987                                        |                 |
| R indices (all data)              | R1 = 0.0377, wR2 = 0.0991                                        |                 |
| Extinction coefficient            | n/a                                                              |                 |
| Largest diff. peak and hole       | 0.368 and -0.298 e.Å <sup>-3</sup>                               |                 |
| CCDC identification code          | 2181219                                                          |                 |

**Table S10.** Hydrogen bonds for form **II** disorder [ $\text{\AA}$  and  $^\circ$ ].

| D-H $\cdots$ A         | d(D-H)  | d(H $\cdots$ A) | d(D $\cdots$ A) | <(DHA) |
|------------------------|---------|-----------------|-----------------|--------|
| N5-H5A $\cdots$ O4(i)  | 0.89(2) | 2.42(2)         | 3.1831(16)      | 145(2) |
| N5-H5B $\cdots$ O4(ii) | 0.84(2) | 2.30(2)         | 3.1065(15)      | 162(2) |
| N4-H4A $\cdots$ O7     | 0.88    | 1.66            | 2.5390(12)      | 172    |
| O7-H7 $\cdots$ N4      | 0.84    | 1.71            | 2.5390(12)      | 167    |

Symmetry transformations used to generate equivalent atoms:

(i)  $x, y+1, z$  (ii)  $-x+2, -y+1, -z+1$



## F. Fourier Transform Infrared Spectroscopy

FTIR spectra of the samples were collected using a Bruker Alpha II, fitted with an ATR eco ZnSe crystal, with a spectral range of 20 000 – 500  $\text{cm}^{-1}$ . OPUS software, *version* 8.5, was used to analyse and characterize the spectra.

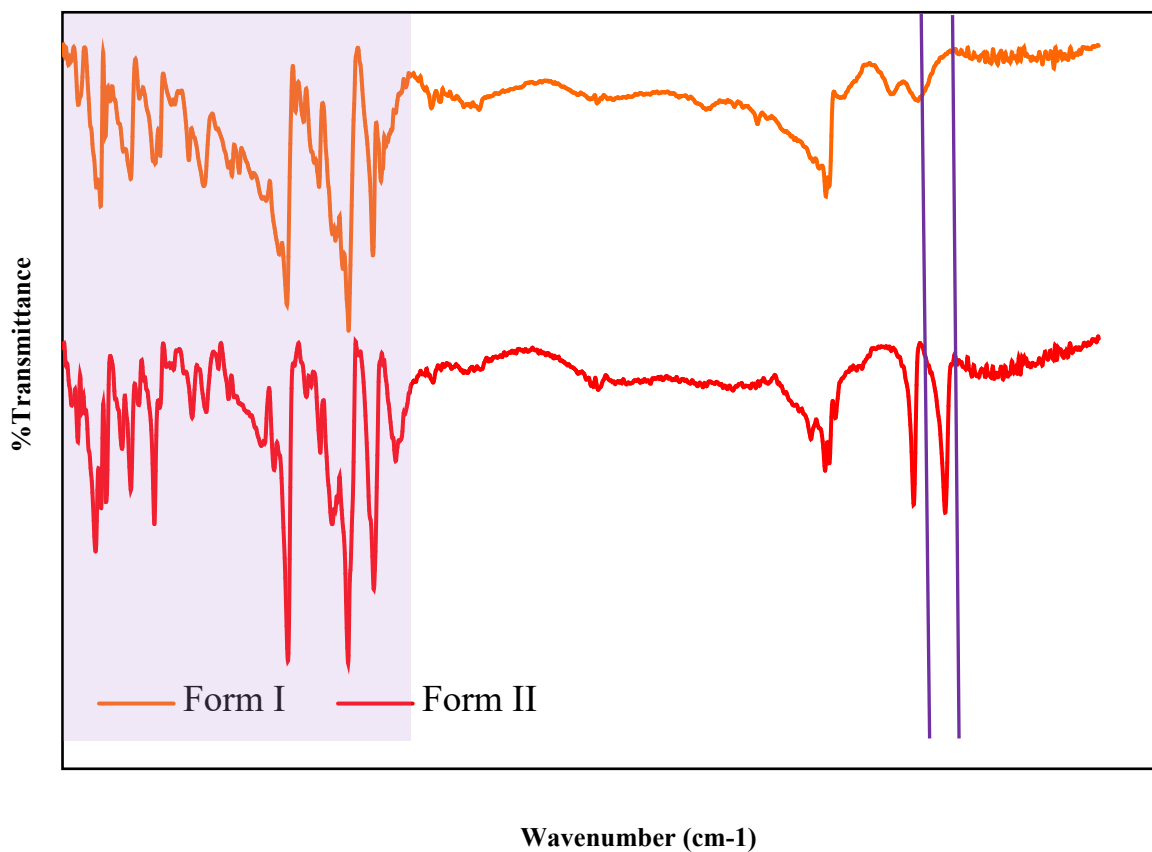

**Figure S6.** Infrared spectra of Forms I and II. The shaded region and the two peaks indicated by the solid purple lines are convenient for distinguishing the two forms.

**Table S11.** Infrared Spectral Analysis.

| Assignment                                      | Functional group                    | Wavenumber (cm <sup>-1</sup> ) |                          |
|-------------------------------------------------|-------------------------------------|--------------------------------|--------------------------|
|                                                 |                                     | Form I                         | Form II                  |
| N – H stretch                                   | Primary amine<br>(produces 2 bands) | 3405, 3316<br>(w, br)          | 3493, 3390<br>(m, sharp) |
| N – H bend                                      | Primary amine                       | 1617<br>(m)                    | 1620<br>(s)              |
| C = O stretch                                   | Carboxylic acid                     | -                              | 1692<br>(m, sharp)       |
| C – O stretch                                   | Carboxylic acid                     | -                              | 1339<br>(s, sharp)       |
| CO <sub>2</sub> <sup>-</sup> asymmetric stretch | Carboxylate                         | 1644<br>(w, br)                | -                        |
| CO <sub>2</sub> <sup>-</sup> symmetric stretch  | Carboxylate                         | 1335<br>(m, br)                | -                        |
| O – H stretch                                   | Carboxylic acid                     | absent                         | 3200-2900<br>(broad, s)  |
| N – H stretch                                   | Pyridinium salt                     | 3102<br>(broad, s)             | absent                   |
| N – O stretch                                   | Nitro compound                      | 1537<br>(s)                    | 1537<br>(s)              |

The most striking difference between the IR spectra of form I and form II are the two N – H stretching peaks of the amino group. In form I, the two N – H stretches are broad and weak, and their position is shifted to a lower wavenumber as compared to that of form II. In contrast, the two N – H stretches in form II are significantly stronger and narrower, and at a higher wavenumber than that of form I. The next difference is less apparent and can be associated with the subsequent peak in both spectra. In the spectrum of form II, the broad peak ranging from 3200-2900 cm<sup>-1</sup>, can be assigned as the O – H stretch of the carboxylic acid in 9aca. The small narrow bumps on this broad O – H peak can be attributed to aromatic C – H stretching peaks, which fall in the same wavenumber range as the O – H stretches. In form I, the broad yet sharp peak at around 3100 cm<sup>-1</sup> can be assigned to the N – H stretch of the protonated pyridine of the 2a5clp<sup>(+)</sup> cation. This provides evidence that form I is a salt, since it lacks the O – H carboxylic acid stretch and instead contains an N – H pyridinium salt stretch which is indicative of proton transfer. Furthermore, it proves that form II is a cocrystal since it contains the O – H carboxylic acid stretch, which indicates retention of the proton by the carboxylic acid.

## G. Powder X-ray Diffraction

Powder X-ray diffraction data patterns were collected at 293 K on a Bruker D2 Phaser diffractometer which employed a sealed tube Co X-ray source ( $\lambda = 1.78897 \text{ \AA}$ ), operating at 30 kV and 10 mA, and LynxEye PSD detector in Bragg-Brentano geometry. The calculated powder diffraction patterns were computed from the single crystal data which was collected at 173 K using Mercury. The peak positions are shifted resulting from the different temperatures at which the samples were measured. The peak intensities vary due to preferred orientation.

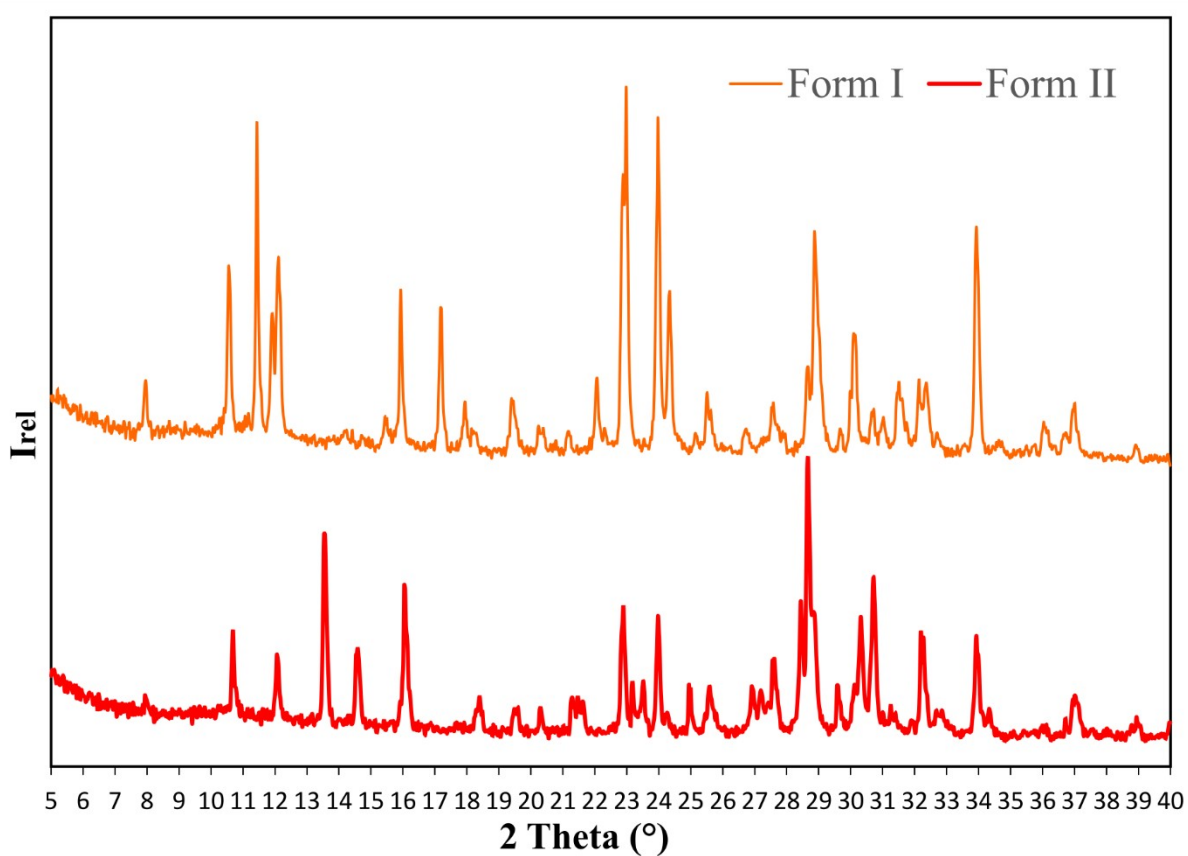

**Figure S7.** Measured PXRD of forms **I** and **II**.

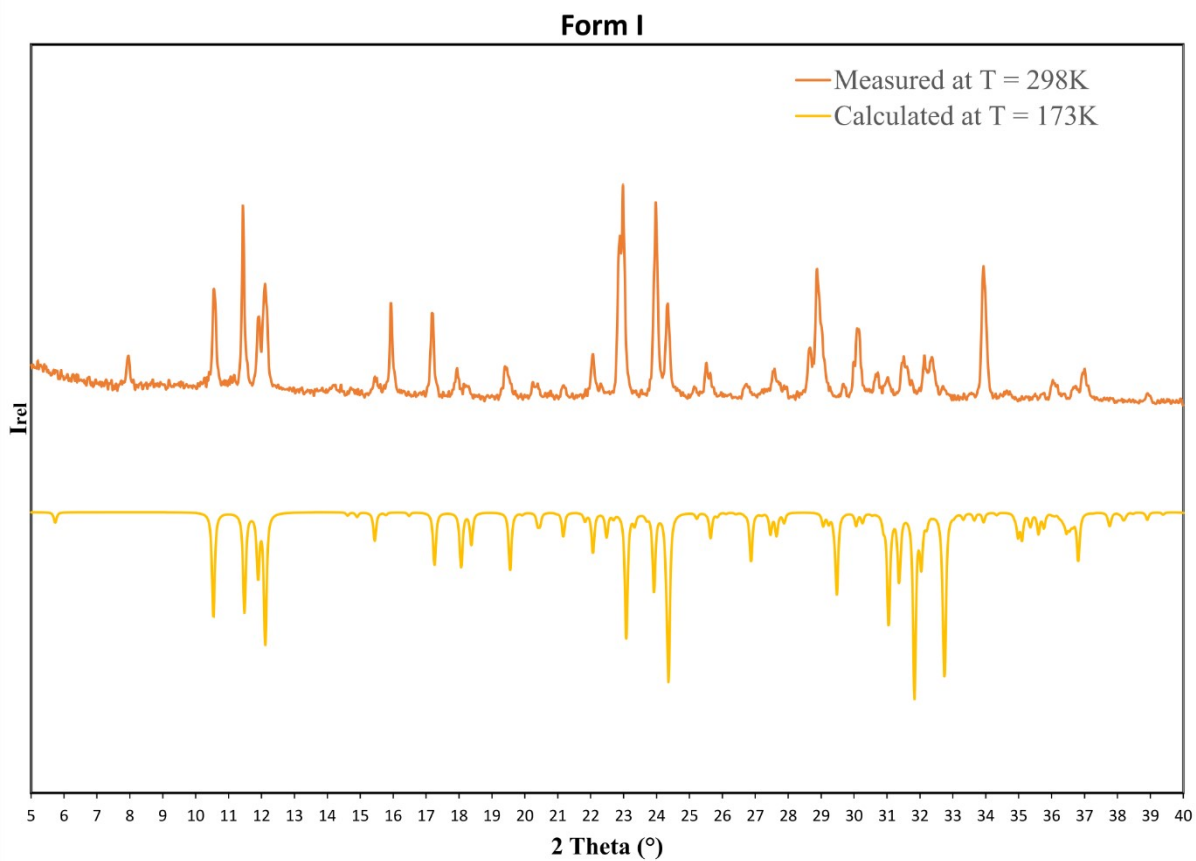

**Figure S8.** Measured vs. calculated PXRD of the orange form I

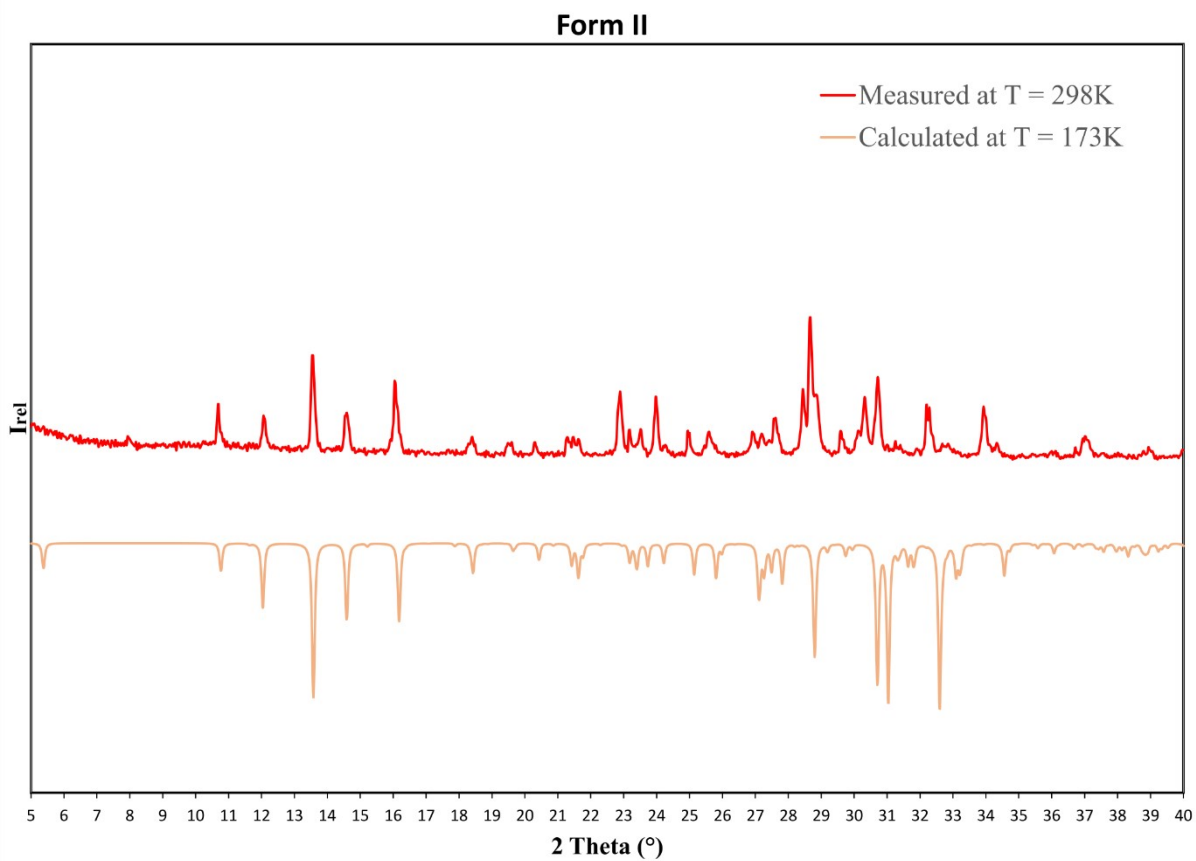

**Figure S9.** Measured vs. calculated PXRD of the red form II.

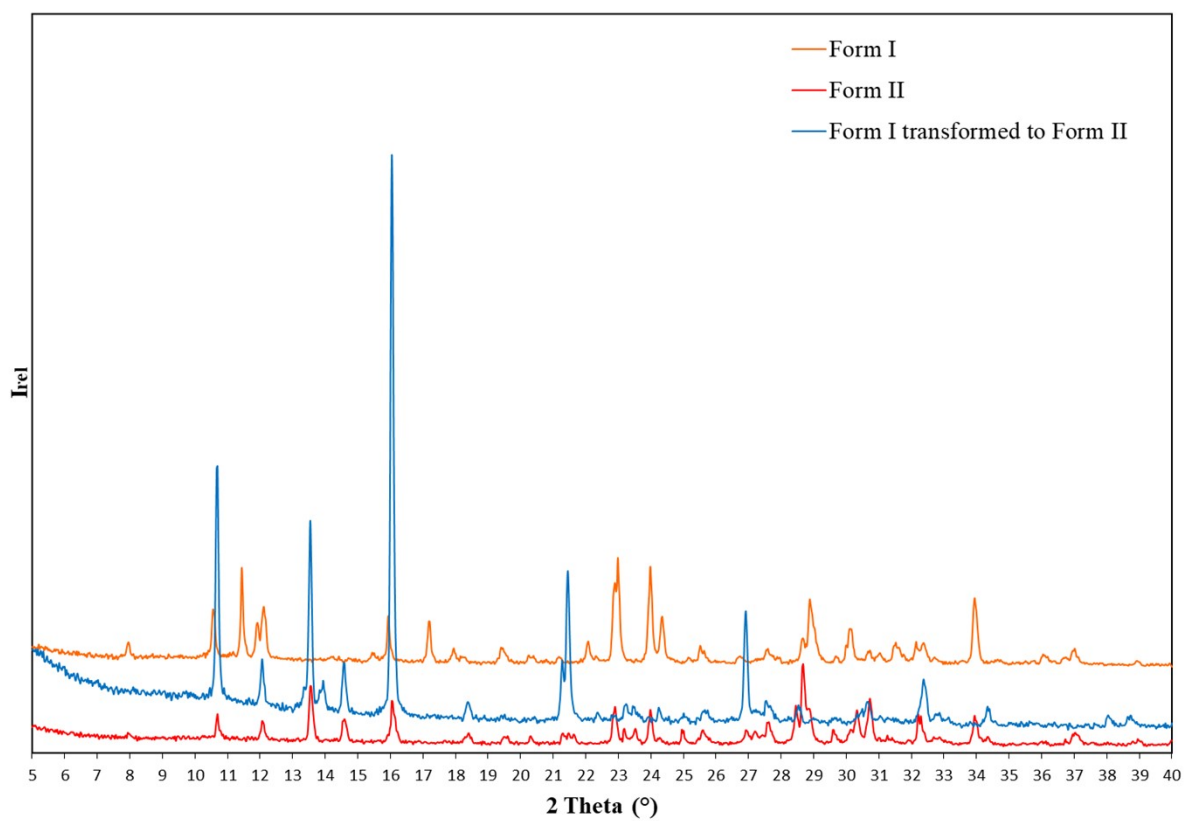

**Figure S10.** Comparison of the powder x-ray diffraction patterns of forms **I** and **II**, and the powder pattern of a sample of form **I**, heated and transformed to form **II** on the DSC (see description in main article). (Note that peak intensities vary due to preferred orientation.)

## H. DSC Results and Traces

Differential scanning calorimetry data (Table S7-9) were collected using a Mettler Toledo 822e with aluminium pans under N<sub>2</sub> gas purge (10 mL/min). *Star SW* 16.20 was used for instrument control and data analysis. Exothermic events were shown as peaks. The temperature and energy calibrations were performed using pure indium (purity 99.99%, m.p. 156.6 °C, heat of fusion 28.45 J g<sup>-1</sup>) and pure zinc (purity 99.99%, m.p. 419.5 °C, heat of fusion 112 J g<sup>-1</sup>).

**Table S12.** Results of DSC traces for **Form I**.

| Polymorph at Start | Sample State | Code   | Heating Rate / K min <sup>-1</sup> | T <sub>onset</sub> / °C | T <sub>peak</sub> / °C | Integral / J g <sup>-1</sup> |
|--------------------|--------------|--------|------------------------------------|-------------------------|------------------------|------------------------------|
| Form I             | Crystal      | 21cm06 | 10                                 | 74.94                   | 80.13                  | -13.78                       |
| Form I             | Crystal      | 21cm11 | 10                                 | 73.31                   | 79.80                  | -13.36                       |
| Form I             | Crystal      | 21cm12 | 10                                 | 72.23                   | 78.13                  | -13.71                       |
|                    |              |        |                                    |                         |                        |                              |
|                    |              |        | <b>Average</b>                     | <b>73.49</b>            | <b>79.35</b>           | <b>-13.6</b>                 |
|                    |              |        | <b>Standard Deviation</b>          | <b>1.1</b>              | <b>0.9</b>             | <b>0.2</b>                   |

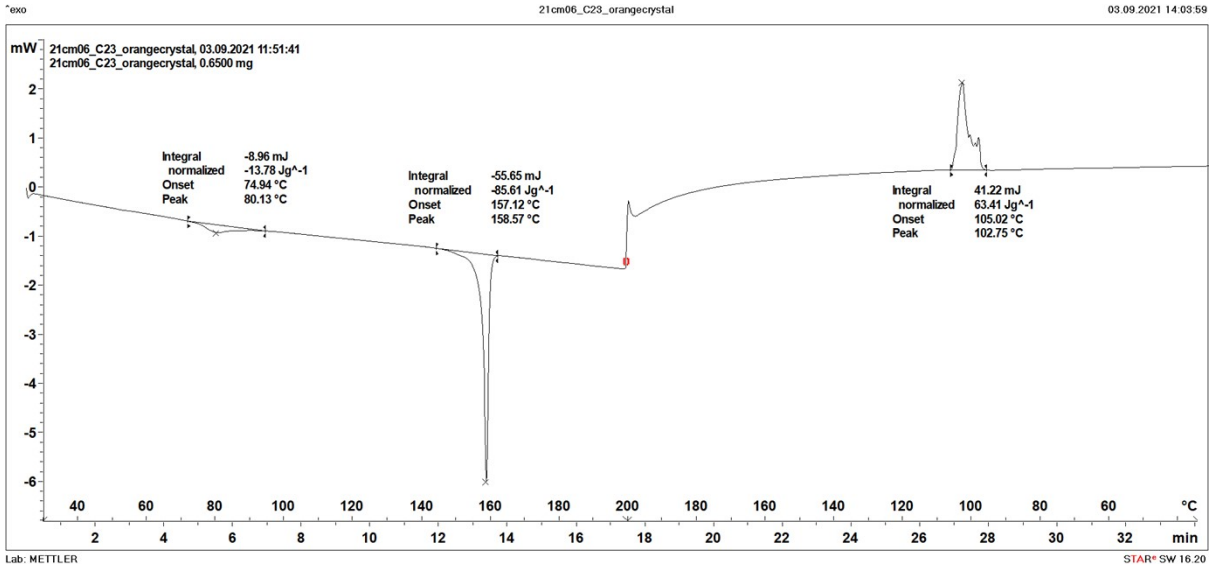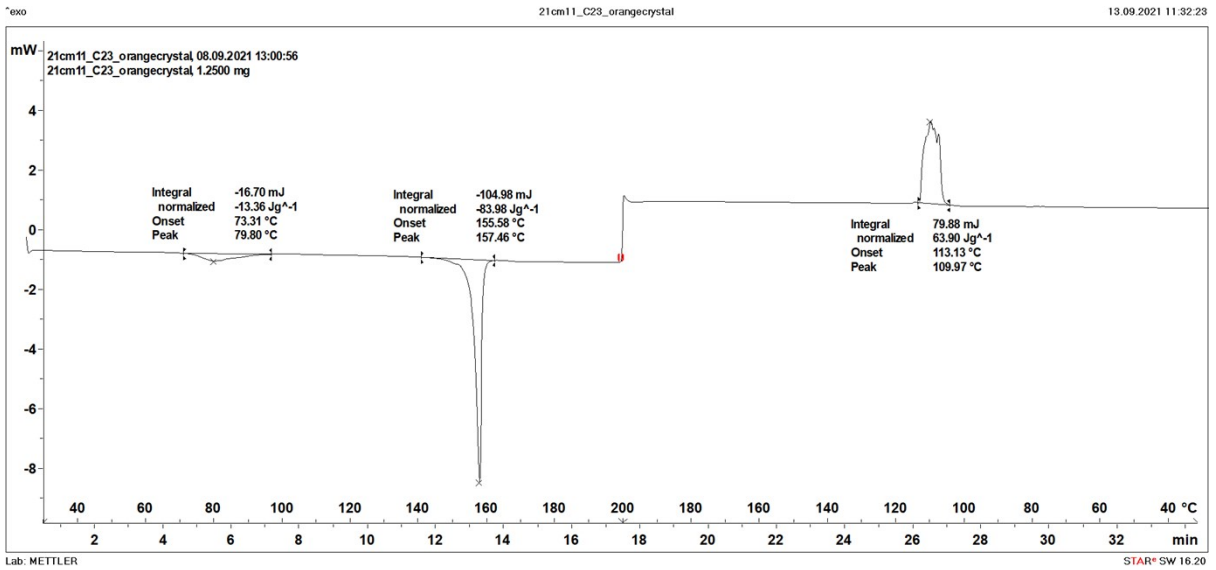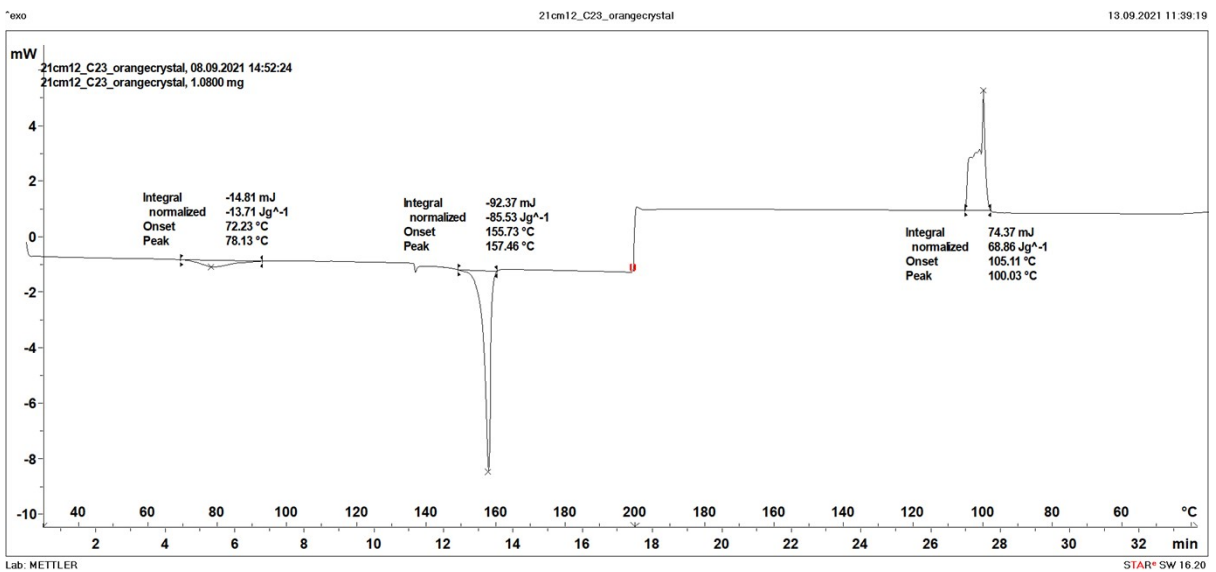

**Table S13.** Results of DSC traces for **Form II**.

| Polymorph at Start | Sample State  | Code   | Heating Rate / K min <sup>-1</sup> | T <sub>onset</sub> / °C | T <sub>peak</sub> / °C | Integral / J g <sup>-1</sup> |
|--------------------|---------------|--------|------------------------------------|-------------------------|------------------------|------------------------------|
| Form II            | crystal       | 21as08 | 10                                 | 157.35                  | 159.09                 | -96.02                       |
| Form II            | ground powder | 21cm04 | 10                                 | 157.61                  | 159.46                 | -98.57                       |
| Form II            | ground powder | 21cm05 | 10                                 | 157.60                  | 159.57                 | -100.50                      |
|                    |               |        |                                    |                         |                        |                              |
|                    |               |        | <b>Average</b>                     | <b>157.5</b>            | <b>159.4</b>           | <b>-98.4</b>                 |
|                    |               |        | <b>Standard Deviation</b>          | <b>0.1</b>              | <b>0.2</b>             | <b>1.8</b>                   |



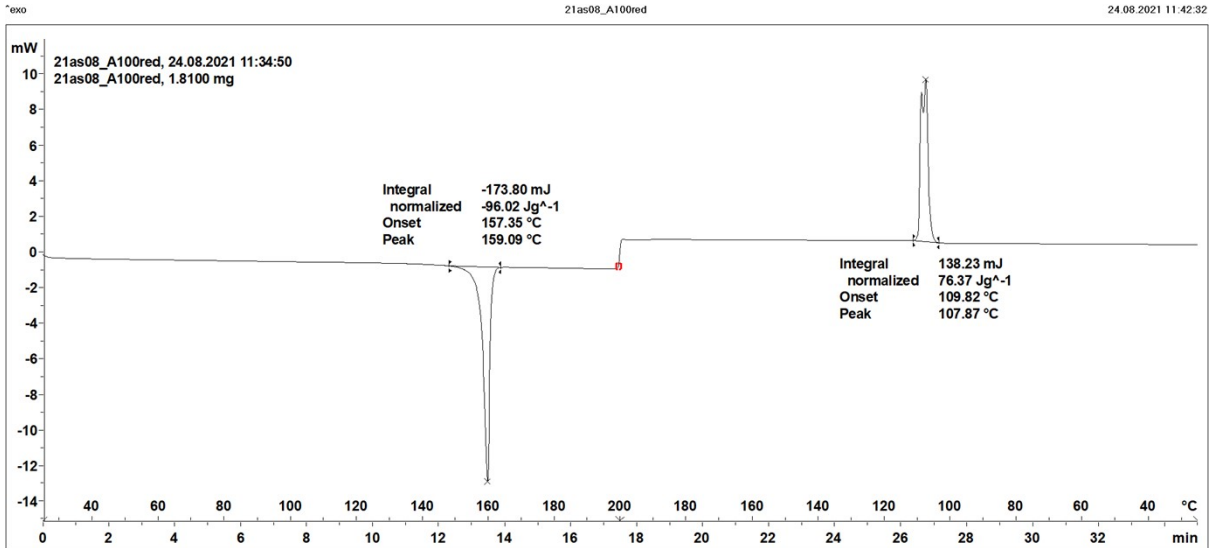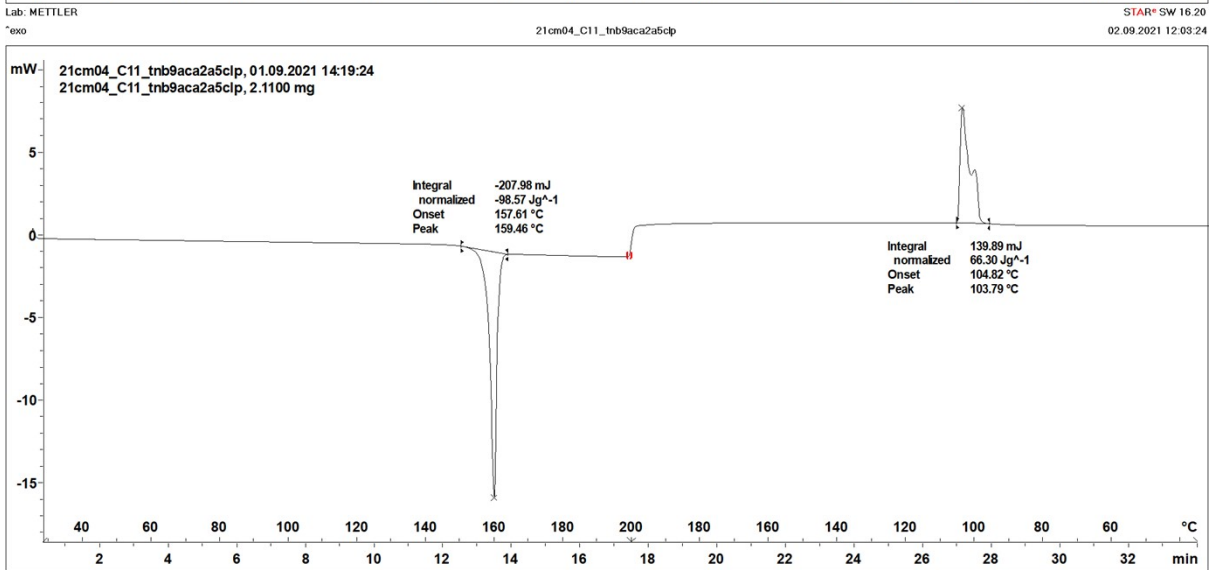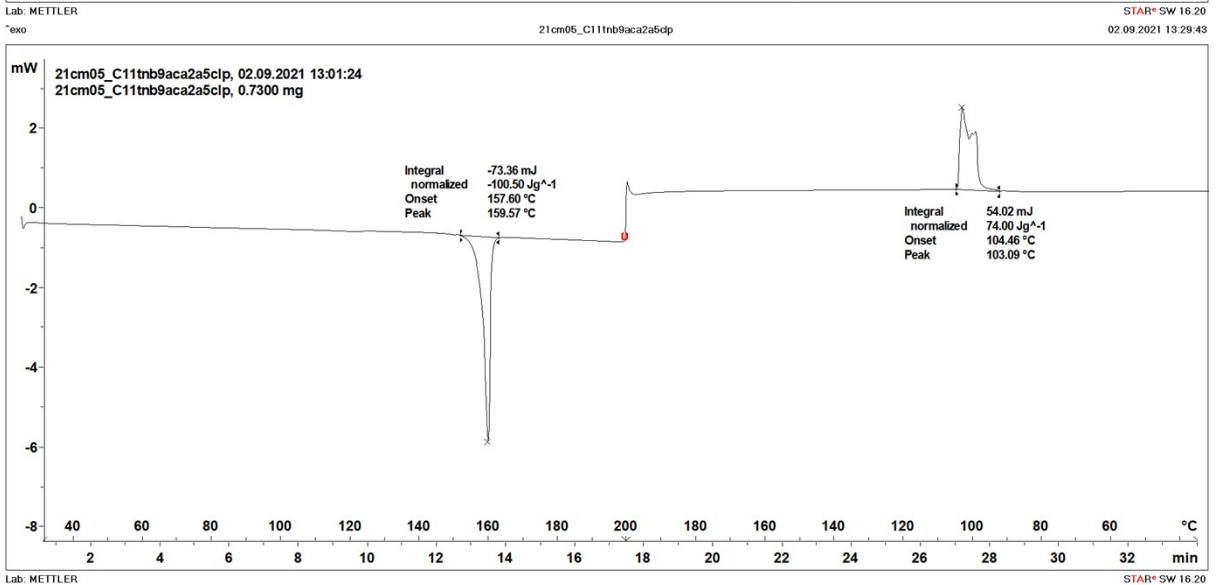

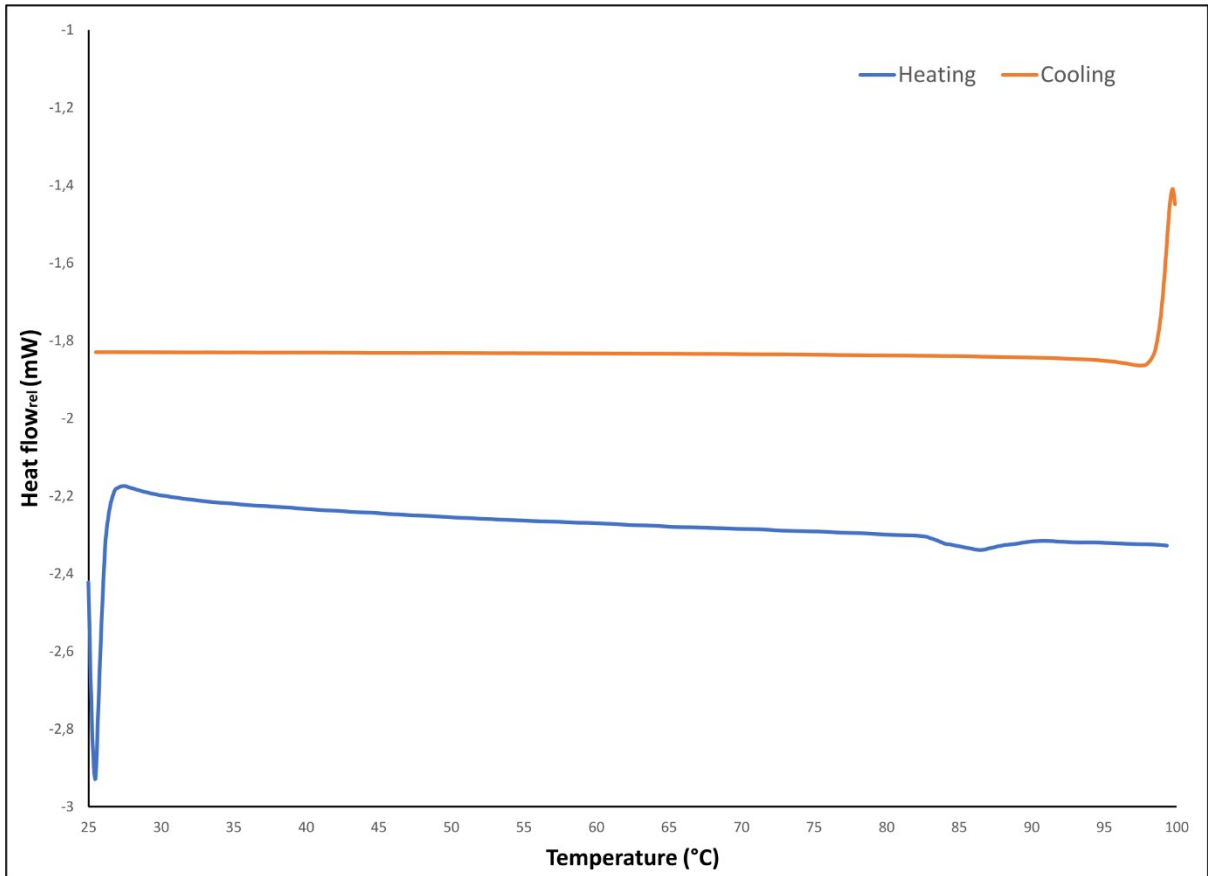

Figure S11. DSC trace of the phase transition of form I to form II.

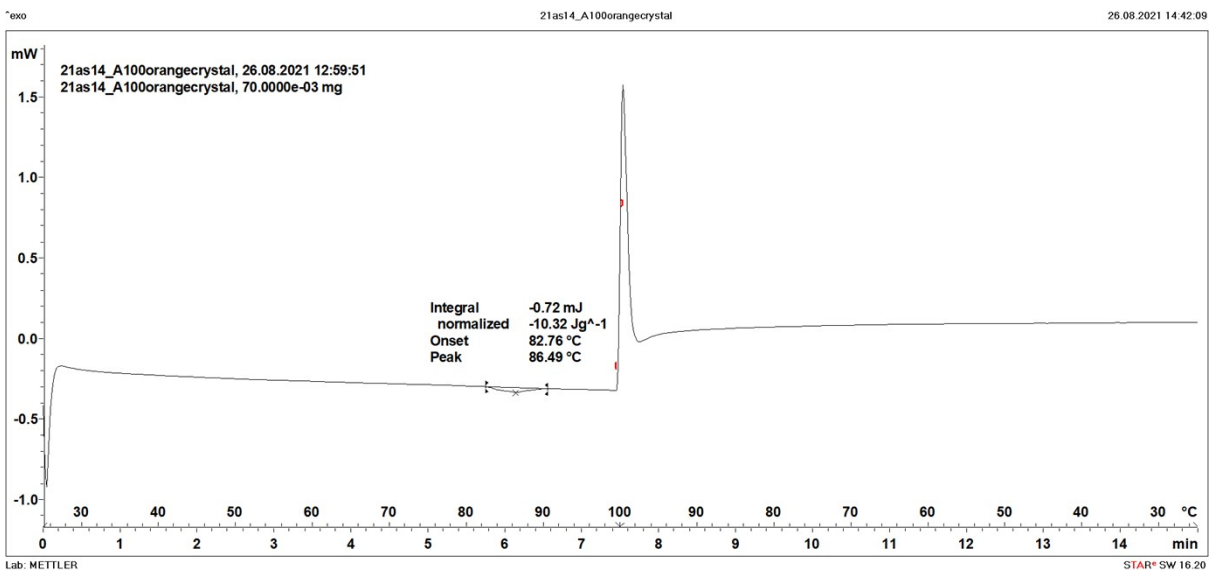

**Table S14.** Results of DSC traces for slurry experiments.

| Experiment Number | Polymorph at Start | Sample State | Code   | Heating Rate / $\text{K min}^{-1}$ | $T_{\text{onset}} / ^\circ\text{C}$ | $T_{\text{peak}} / ^\circ\text{C}$ | Integral / $\text{J g}^{-1}$ |
|-------------------|--------------------|--------------|--------|------------------------------------|-------------------------------------|------------------------------------|------------------------------|
| Slurry 1          | Form II            | powder       | 21as35 | 10                                 | 156.57                              | 158.49                             | -99.82                       |
| Slurry 2          | Form II            | powder       | 21as36 | 10                                 | 157.88                              | 159.31                             | -99.12                       |

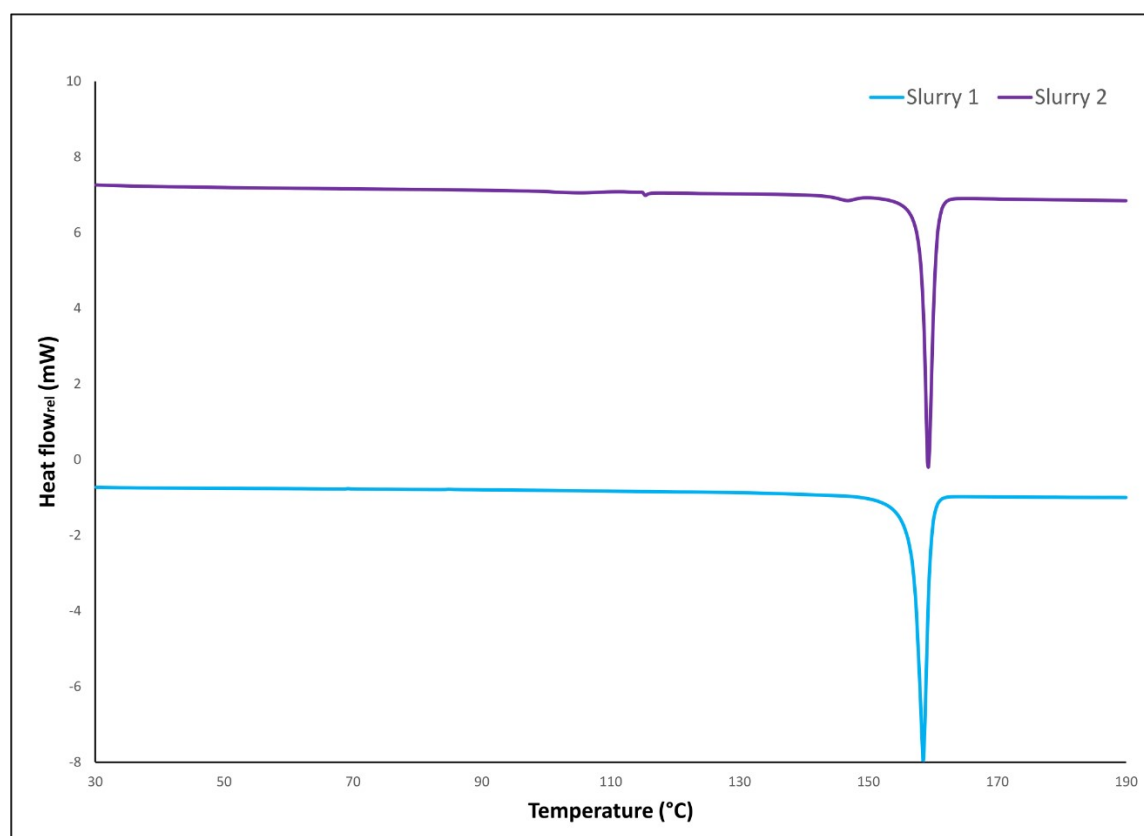

**Figure S12.** DSC traces of form II powders from slurry experiments.

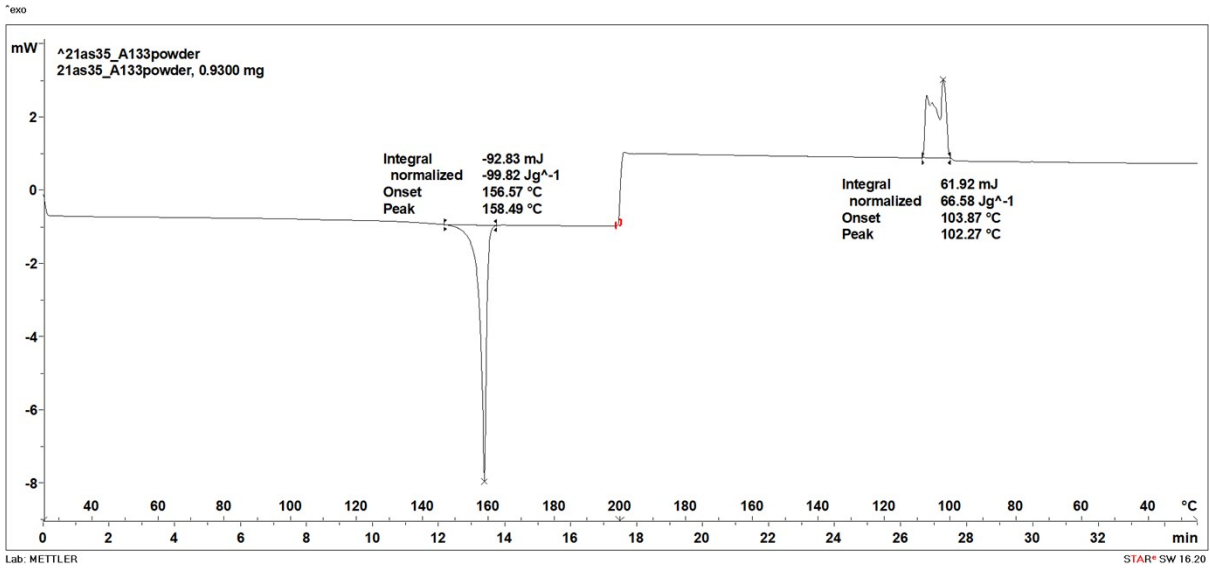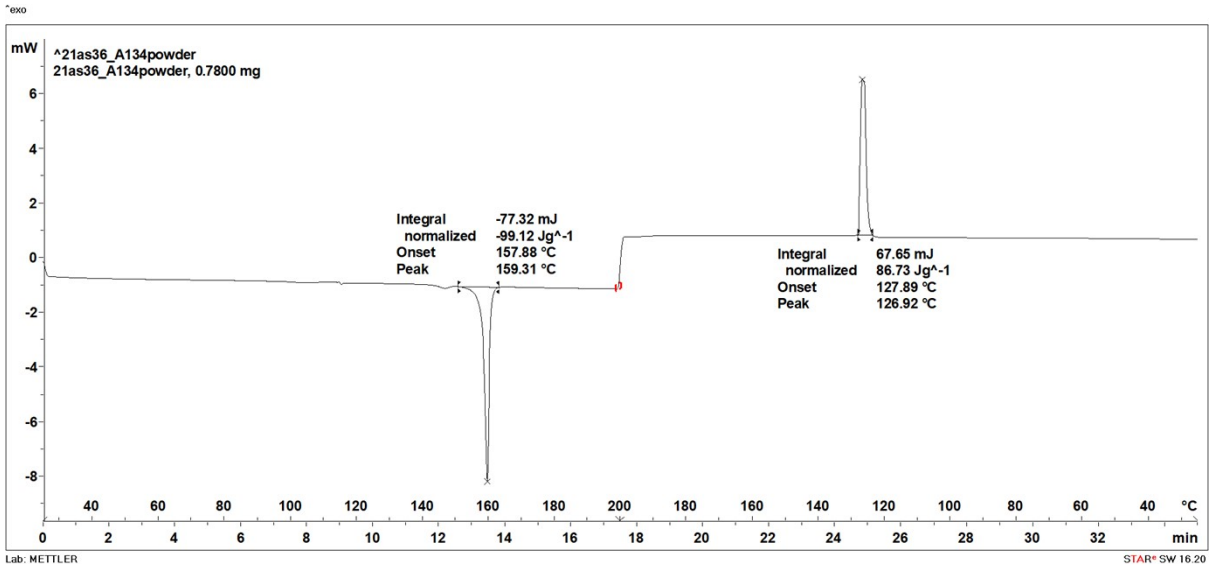

## I. Variable Temperature Single Crystal X-ray Diffraction

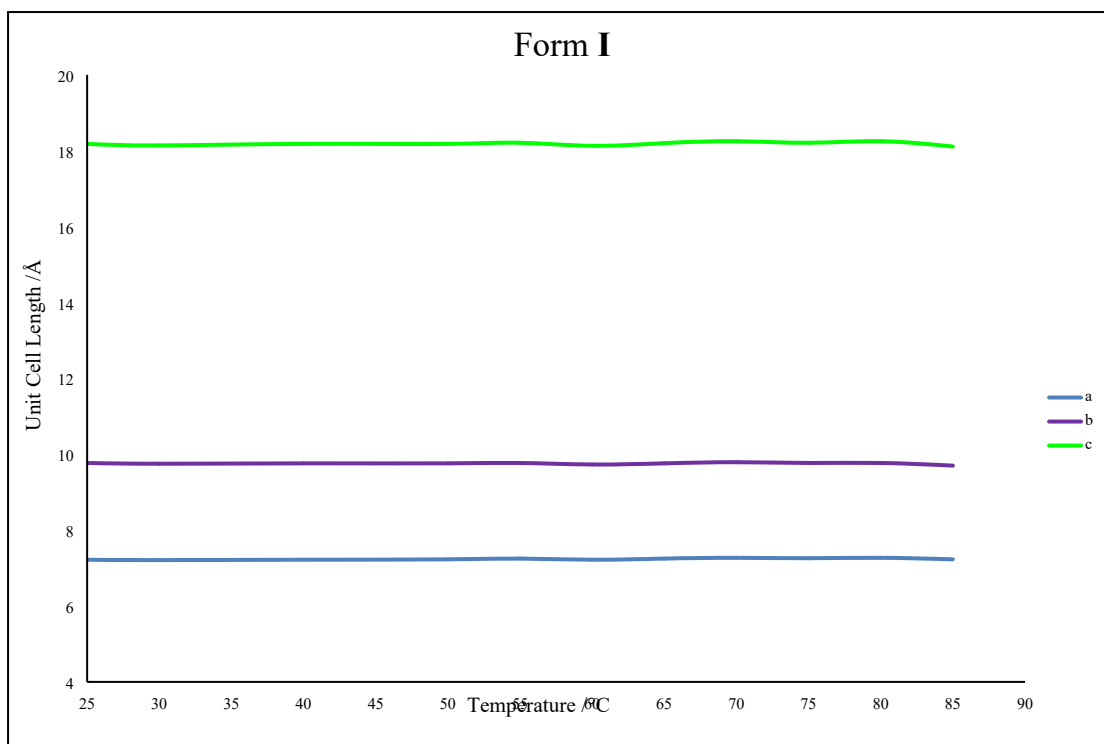

**Figure S13.** Variable temperature SCXRD determination of unit cell lengths of form I with an increase in temperature.

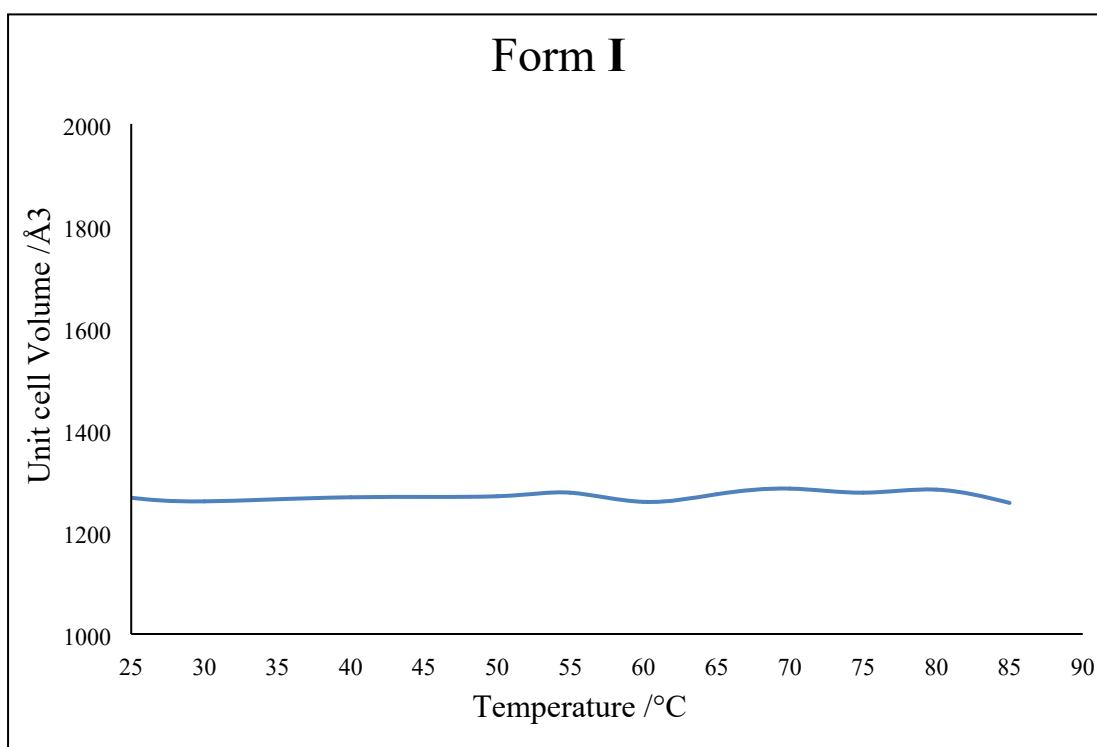

**Figure S14.** Variable temperature SCXRD determination of cell volume of form I with an increase in temperature.

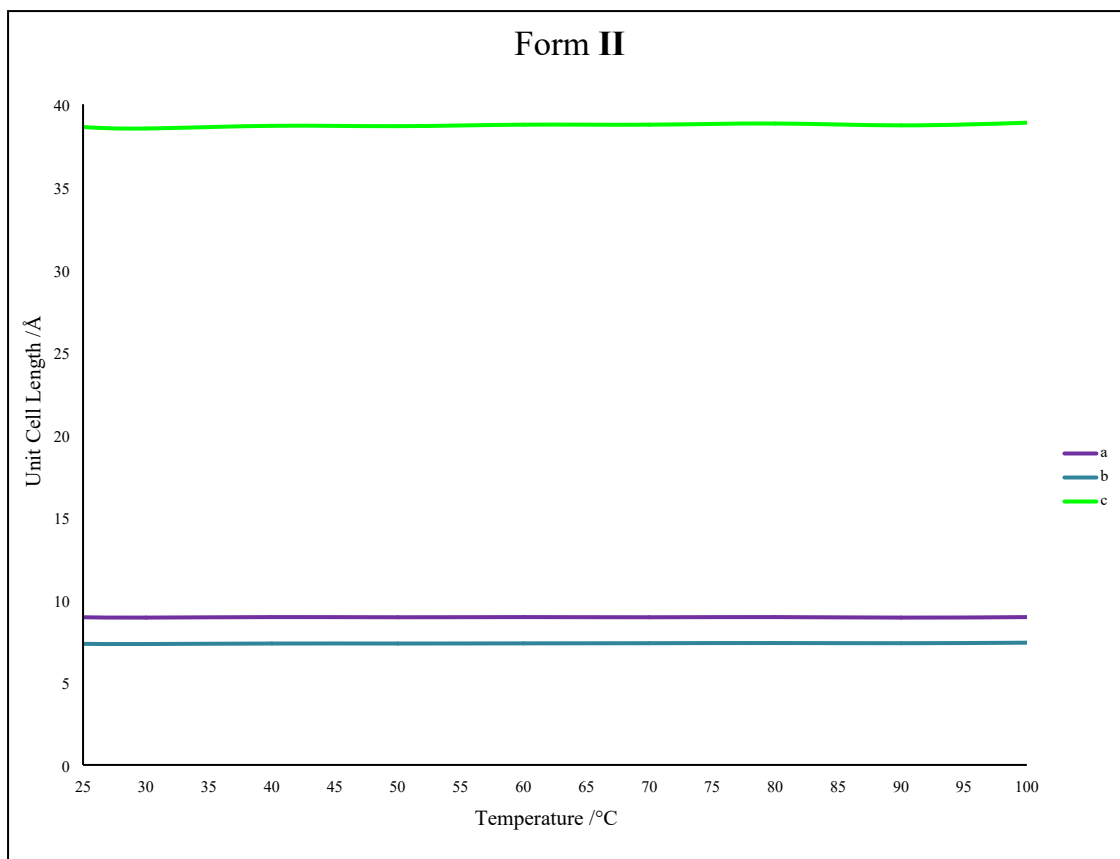

**Figure S15.** Variable temperature SCXRD determination of unit cell lengths of form II with an increase in temperature.

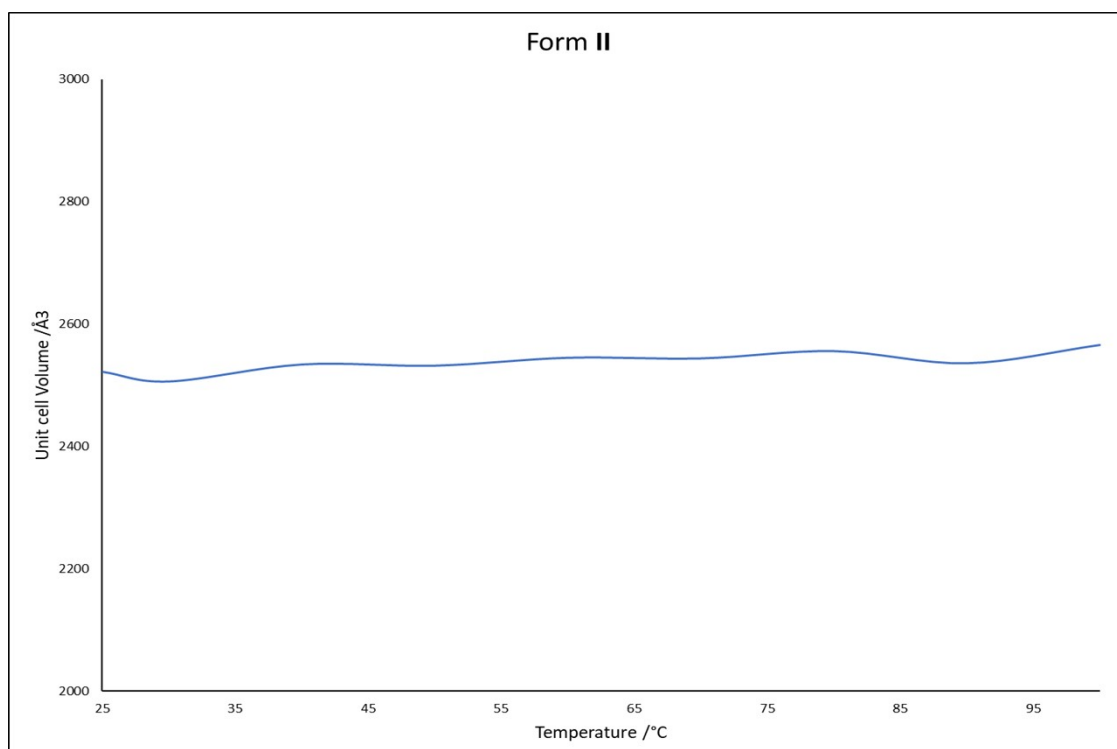

**Figure S16.** Variable temperature SCXRD determination of cell volume of form II with an increase in temperature.

## J. Photoluminescence Spectroscopy

Photoluminescence spectra of samples of form **I** and form **II** were acquired at room temperature using a Horiba QuantaMaster 8000 spectrofluorometer with a Xe lamp and a Hamamatsu R2658 PMT detector. The excitation wavelength used was 469 nm. This value was determined via a PLE spectrum to be the wavelength that gave a maximum emission intensity at 650 nm for Form I. The PL spectra are both emission corrected for the throughput of the emission monochromator and the detector efficiency.

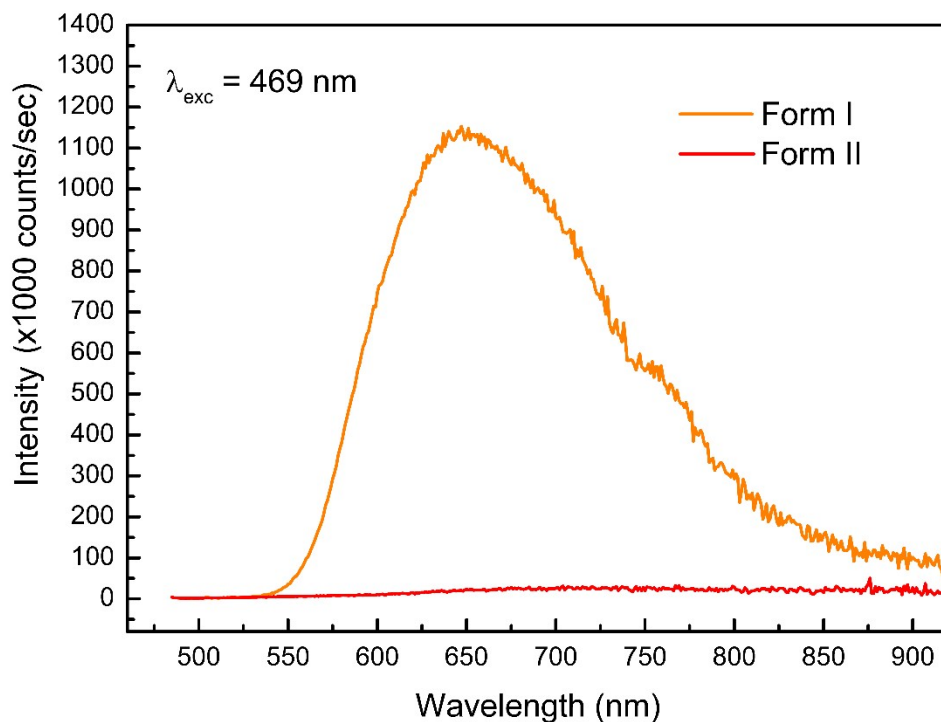

**Figure S17.** Photoluminescence spectra of form **I** and form **II** acquired under exactly the same measurement conditions.

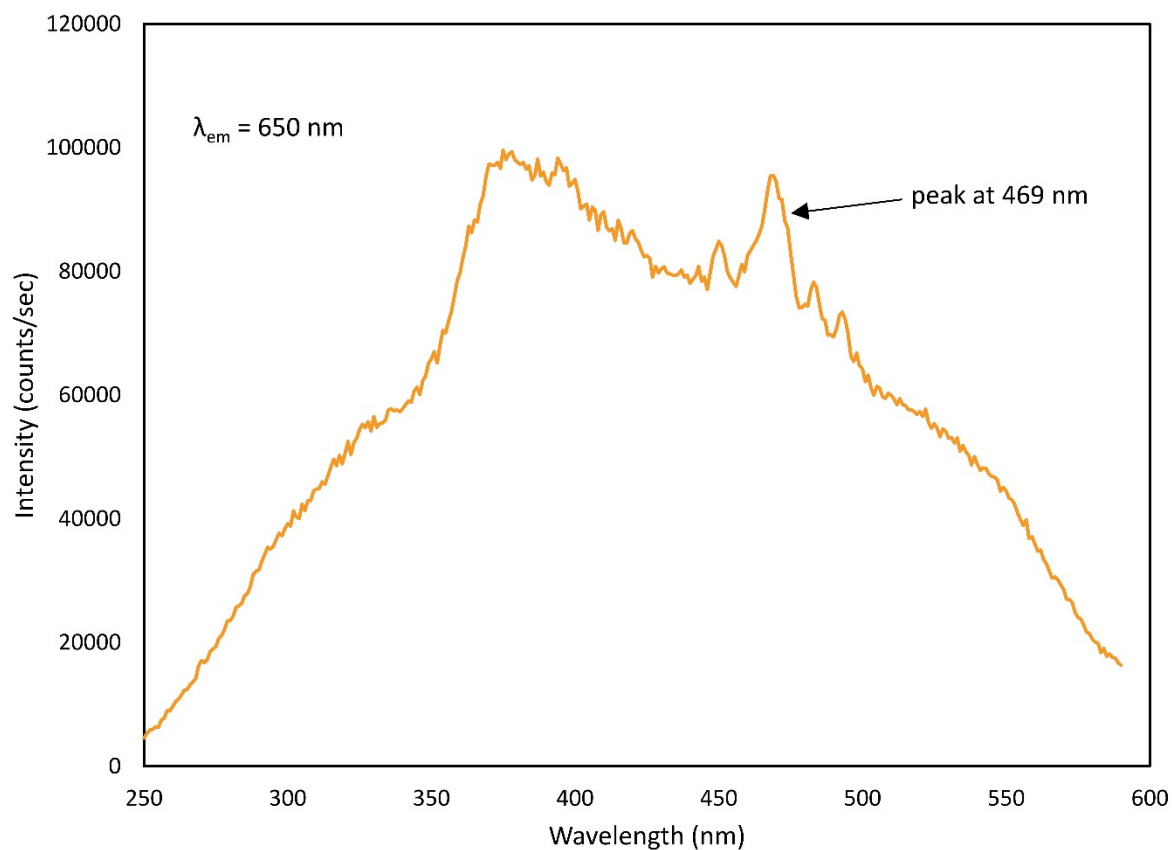

**Figure S18.** The figure shows the photoluminescence excitation spectrum for Form I, where emission at 650 nm was monitored. The peak at 469 nm is indicated and is the justification for our choice of 469 nm as the excitation wavelength for the steady-state PL emission spectra



## K. Nuclear Magnetic Resonance Spectroscopy

<sup>1</sup>H NMR spectra were recorded on a Bruker Avance III (500 MHz) spectrometer. An NMR sample of tnb, 9aca, and 2a5clp (combined in a 1:1:1 stoichiometric ratio) was prepared in acetone. Chemical shifts are reported in parts per million (ppm) relative to the tetramethylsilane (TMS) referenced against the protonated solvent (acetone). Coupling constants (*J*) are reported in Hertz (Hz). Reported NMR splitting signals are abbreviated as follows: s = singlet, d = doublet, and t = triplet.

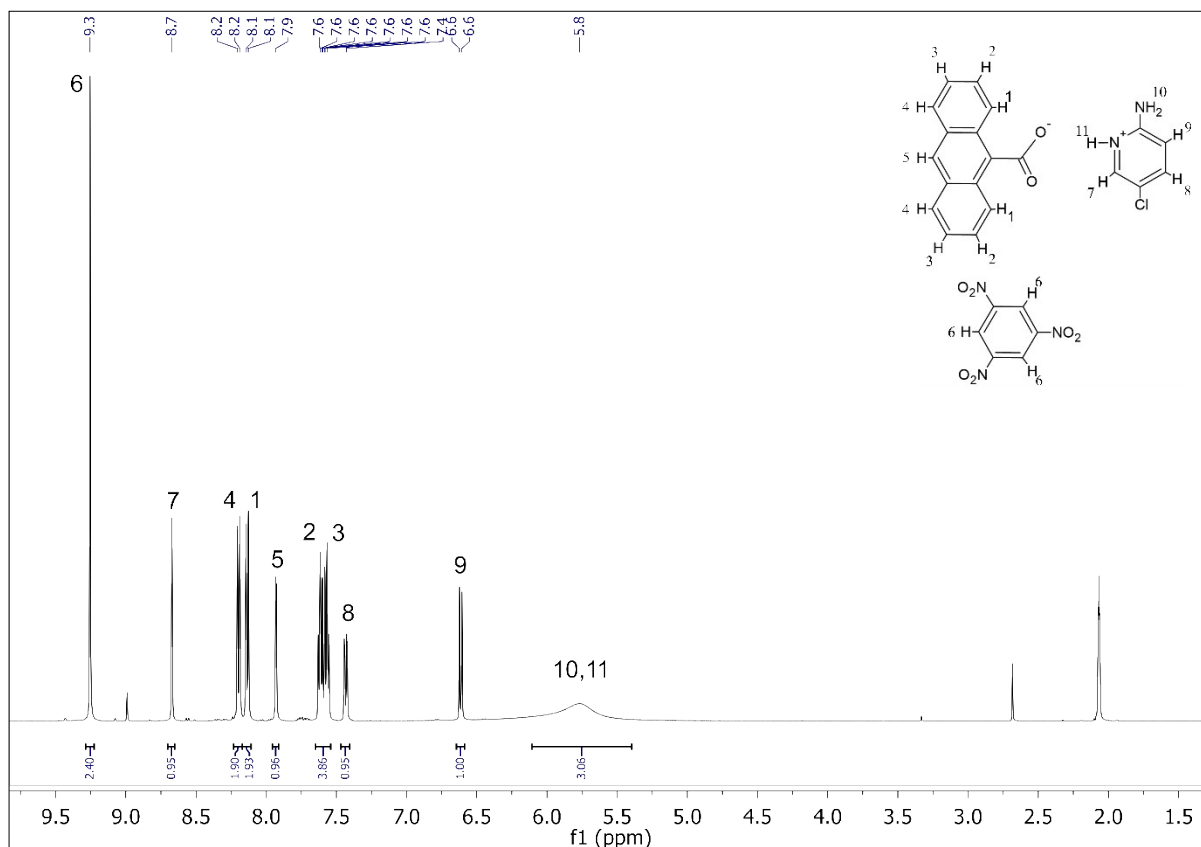

**Figure S19.** <sup>1</sup>H NMR spectrum of tnb+9aca+2a5clp in acetone.

**Table S15.** NMR peak assignments.

| Peak position (ppm) | Integration | Multiplicity | Assignment |
|---------------------|-------------|--------------|------------|
| 9.3                 | 3H          | s            | 6          |
| 8.7                 | 1H          | s            | 7          |
| 8.2                 | 2H          | d            | 4          |
| 8.1                 | 2H          | d            | 1          |
| 7.9                 | 1H          | s            | 5          |
| 7.6                 | 2H          | t            | 2          |
| 7.6                 | 2H          | t            | 3          |
| 7.4                 | 1H          | d            | 8          |
| 6.6                 | 1H          | d            | 9          |
| 5.8                 | 3H          | s            | 10 and 11  |
